# Supplementary material for: Translation and Validation of the Sinhalese Version of the Brief Medication Questionnaire in Patients with Diabetes Mellitus
Source: Hindawi journal article supplement (doi:10.1155/2018/7519462), 2018-01-01
Supplement: f1 [file 7519462.f1.pdf]

දියවැඩියා ඖෂධ භාවිතය පිළිබඳ කෙටි ප්‍රශ්නාවලිය

**(Brief Medication Questionnaire on Diabetes – BMQ)**

මෙම ප්‍රශ්නාවලියේ දැනට දියවැඩියාව සඳහා ගන්නා ඖෂධ ගැන පමණක් අසනු ලබයි.

ඔබ දියවැඩියාව සඳහා ගනිමින් සිටින සෑම ඖෂධයක්ම මෙහි කරුණාකර සඳහන් කරන්න.

1. ඔබ අද දින ඔබේ දියවැඩියා ඖෂධ ඔබ සමඟ සායනයට රැගෙනවිත් තිබේද?

1. නැත

2. ඔව්

2. ඔබ දැනට දියවැඩියාව සඳහා කොපමණ ඖෂධ වර්ග ගණනක් භාවිතා කරන්නේද?

ඖෂධ ගණන .....

3. ඔබ දැනට දියවැඩියාව සඳහා ගන්නා ඖෂධ මොනවාද?

ඖෂධ නාමය හෝ ඖෂධ ගැන විස්තරයක් (උදා :ඖෂධ මාත්‍රාහව, දිනකට ගන්නා වාර ගණන )

ඖෂධ A: .....

ඖෂධ B: .....

ඖෂධ C: .....

ඖෂධ D:.....

4. ඔබ පසුගිය මාස 6 තුළ දියවැඩියාව සඳහා භාවිතා කළ කිසියම් ඖෂධයක් නතර කළාද?

ඔව්/නැත

එසේ නතර කළා නම් ;

a. නතර කළ ඖෂධය

b. නතර කළ හේතුව

1. ....

2. ....

මම මෙම ඖෂධය දිනකට: 0    1    2    3    වරක් භාවිතා කළෙමි.

d. පසු ගිය සතිය තුළ ඔබ සාමාන්‍යයෙන් එක් වරකදී මෙම ඖෂධය කොපමණ ජ්‍යෙෂ්ඨත්වයක් භාවිතා කළාද?

මම මෙම ඖෂධය එක් වරකදී පෙනි/කරු: 0 1 2 3 ක් භාවිතා කළෙමි

e. පසු ගිය සතිය තුළ ඔබට මෙම ඖෂධය ගැනීමට කොපමණ වරක් නොහැකි වුණාද?  
මා හට මෙම ඖෂධය ගැනීමට: 0 1 2 3 4 5 6 7 වරක් නොහැකි වුනි.

8. ඔබට කොතරම් හොඳින් මෙම ඖෂධය ක්‍රියා කරන්නේ ද?

1. කිසිසේත්ම ක්‍රියාකාරී
2. මධ්‍යස්ථයෙන් ක්‍රියාකාරී
3. ඉතා හොඳින් ක්‍රියා කරයි
4. නොදනිමි

9. ඔබට මෙම ඖෂධය නිසා අපහසුතාවයන් ඇතිවේද?

1. කිසිවිටක නැත
2. තරමක් අපහසුතා ඇතිවේ
3. බොහෝ අපහසුතා ඇතිවේ
4. නොදනිමි

10. මෙම ඖෂධය භාවිතා කරන විට ඔබට පහත අපහසුතා කොපමණ ජ්‍යෙෂ්ඨත්වයකට ඇතිවේද ?

|                                                        | කිසිවිටක<br>නැත | මද<br>වශයෙන් | බොහෝ<br>විට |
|--------------------------------------------------------|-----------------|--------------|-------------|
| a. සියලු මාත්‍රාමතක තබා ගැනීම අපහසුය                   | 0               | 1            | 2           |
| b. මෙම ඖෂධය සඳහා වියදම දැරීමට අපහසුය                   | 0               | 1            | 2           |
| c. ඖෂධ අවසන්වූ පසු නැවතත් නියමිත කාලයට ලබා ගැනීම       | 0               | 1            | 2           |
| d. මෙම ඖෂධය නිසා මා හට තවමත් අනවශ්‍යය අතුරු ආබාධ ඇතිවේ | 0               | 1            | 2           |
| e. මම මෙම ඖෂධයේ දිගු කාලීන බලපෑම් ගැන වද වෙමි          | 0               | 1            | 2           |
| f. මෙම ඖෂධය පිළිබඳ මා හට වෙනත් ගැටලු හෝ ප්‍රශ්න ඇත     | 0               | 1            | 2           |
